# Supplementary material for: Brain MRI correlations with disease burden and biomarkers in Fabry disease
Source: Springer Nature journal article supplement (doi:10.1007/s00415-023-11826-8), 2023-06-25
Supplement: MOESM1 [file 25535402]

### Supplement table 1. Demographic data of patients with Fabry disease

| Family | No.  | Gender | α-GalA (%) | Lyso-Gb3 (ng/ml) | GLA mutation               |                      | Onset age (year-old) | CNS manifestations                                               | Risk factors                  | MSSI | Classic type | Clinical event |
|--------|------|--------|------------|------------------|----------------------------|----------------------|----------------------|------------------------------------------------------------------|-------------------------------|------|--------------|----------------|
| F1     | P1   | M      | 2%         | 97.3             | c.929T>G                   | p.(Leu310Arg)        | 7                    | Stroke, Dizziness, Tinnitus, Hearing loss                        | (-)                           | 45   | (+)          | (+)            |
| F2     | P2   | F      | 49%        | 20.26            | c.1188_1208dup             | p.(Phe396_Arg402dup) | 6                    | Stroke, Dizziness, Hearing loss, Cognitive decline, Depression   | HT, Hyperlipidemia, Hyper-HCY | 48   | (+)          | (+)            |
| F2     | P3   | F      | 91%        | 10.84            |                            |                      | 6                    | Stroke, Headache, Dizziness, Tinnitus, Hearing                   | Hyper-HCY                     | 24   | (+)          | (+)            |
| F3     | P4   | M      | 2%         | 32.47            | c.983G>A                   | p.(Gly32)            | 10                   | (-)                                                              | (-)                           | 19   | (+)          | (-)            |
| F3     | P5   | F      | 14%        | 3.08             |                            |                      | 7                    | (-)                                                              | (-)                           | 11   | (-)          | (-)            |
| F3     | P6   | M      | 2%         | 101.69           |                            |                      | 10                   | (-)                                                              | (-)                           | 17   | (+)          | (-)            |
| F3     | P7   | F      | 13%        | 3.31             |                            |                      | 10                   | Headache, Dizziness                                              | HT, Hyperlipidemia            | 18   | (-)          | (-)            |
| F4     | P8   | M      | 1%         | 103.84           | c.901C>T                   | p.(Arg301*)          | 7                    | Dizziness, Tinnitus, Vision loss, Cognitive decline              | (-)                           | 23   | (+)          | (-)            |
| F5     | P9   | M      | 1%         | ND               | c.1020G>A                  | p.(Trp34)            | 13                   | (-)                                                              | (-)                           | 8    | (+)          | (-)            |
| F6     | P10* | M      | 24%        | ND               | c.1033_1034del             | p.(Ser345Argfs*29)   | 29                   | Stroke, Dizziness                                                | Hyperlipidemia                | 32   | (+)          | (+)            |
| F7     | P11  | F      | Nor.       | ND               | c.901C>T                   | p.(Arg30)            | 11                   | Dizziness                                                        | (-)                           | 11   | (+)          | (-)            |
| F8     | P12  | M      | 2%         | 87.2             | c.680G>A                   | p.(Arg227Gln)        | 7                    | Stroke, Headache, Dizziness,                                     | Hyperlipidemia                | 48   | (+)          | (+)            |
| F9     | P13  | M      | 3%         | 127.34           | Duplication (exon6)        |                      | 7                    | (-)                                                              | (-)                           | 11   | (+)          | (-)            |
| F10    | P14  | M      | 1%         | ND               | c.485G>A                   | p.(Trp162*)          | 7                    | Dizziness, Tinnitus, Hearing loss                                | (-)                           | 24   | (+)          | (-)            |
| F11    | P15  | M      | 2%         | 89.18            | c.916C>T                   | p.(Gln306*)          | 10                   | Dizziness, Tinnitus, Hearing loss                                | (-)                           | 20   | (+)          | (-)            |
| F12    | P16  | M      | 3%         | 65.56            | c.466G>A                   | p.(Ala156Thr)        | 10                   | Stroke, Dizziness, Vision loss                                   | (-)                           | 11   | (+)          | (+)            |
| F13    | P17  | M      | 1%         | 81.23            | c.59_72del                 | p.(Ala20Glyfs*6)     | 9                    | Dizziness, Tinnitus, Hearing loss                                | (-)                           | 19   | (+)          | (-)            |
| F14    | P18  | M      | 5%         | 51.71            | c.463G>C                   | p.(Asp155His)        | 7                    | Stroke, Headache, Dizziness, Hearing loss, Cognitive             | Hyperlipidemia                | 34   | (+)          | (+)            |
| F14    | P19  | F      | 33%        | 2.99             |                            |                      | 7                    | Headache, Cognitive                                              | HT                            | 18   | (+)          | (-)            |
| F15    | P20  | M      | 5%         | ND               | c.758T>C                   | p.(Ile253Thr)        | 8                    | Stroke, Dizziness, Cognitive decline                             | HT                            | 42   | (+)          | (+)            |
| F15    | P21  | M      | 3%         | 11.05            |                            |                      | 27                   | (-)                                                              | HT, Hyperlipidemia            | 31   | (+)          | (-)            |
| F15    | P22  | F      | 93%        | ND               |                            |                      | 5                    | Headache,                                                        | (-)                           | 5    | (-)          | (-)            |
| F16    | P23  | M      | 5%         | ND               | c.728T>C                   | p.(Leu24)            | 7                    | Dizziness                                                        | (-)                           | ND   | (+)          | (-)            |
| F16    | P24  | F      | Nor.       | ND               |                            |                      | 7                    | (-)                                                              | (-)                           | ND   | (+)          | (-)            |
| F17    | P25  | M      | 1%         | 89.75            | c.680G>A                   | p.(Arg227Gln)        | 29                   | Dizziness, Tinnitus, Hearing loss, Cognitive decline, Depression | HT, Hyperlipidemia            | 59   | (+)          | (+)            |
| F17    | P26  | F      | 21%        | 3.1              |                            |                      | 22                   | Tremor                                                           | (-)                           | 2    | (-)          | (-)            |
| F18    | P27  | M      | 4%         | 55.34            | c.803_806del               | p.(Leu268*)          | 9                    | Tinnitus, Vision loss, Cognitive decline, Depression             | HT, Hyperlipidemia            | 23   | (+)          | (-)            |
| F18    | P28  | F      | 6%         | 7.95             |                            |                      | 31                   | (-)                                                              | (-)                           | 13   | (-)          | (-)            |
| F18    | P29  | M      | 3%         | 105.12           |                            |                      | 7                    | (-)                                                              | (-)                           | 10   | (+)          | (-)            |
| F19    | P30  | F      | Nor.       | ND               | large intragenic deletions |                      | 5                    | Dizziness, Cognitive                                             | Hyperlipidemia                | 28   | (+)          | (+)            |
| F19    | P31  | M      | 3%         | 200              |                            |                      | 9                    | Dizziness, Tinnitus, Hearing loss                                | (-)                           | 33   | (+)          | (+)            |
| F20    | P32  | M      | 6%         | ND               | c.605G>T                   | p.(Cys20)            | 6                    | (-)                                                              | (-)                           | 10   | (+)          | (-)            |
| F20    | P33  | M      | 1%         | ND               |                            |                      | 7                    | Dizziness                                                        | (-)                           | 36   | (+)          | (-)            |
| F21    | P34  | F      | 10%        | 8.25             | c.1024C>T                  | p.(Arg34)            | 50                   | Dizziness                                                        | HT                            | 6    | (-)          | (-)            |
| F21    | P35  | M      | 1%         | 81.14            |                            |                      | 7                    | Stroke,                                                          | HT, Hyper-                    | 38   | (+)          | (+)            |
| F22    | P36  | M      | 14%        | ND               | c.453C>A                   | p.(Tyr151)           | 5                    | Tinnitus, Hearing                                                | (-)                           | 33   | (+)          | (+)            |
| F23    | P37  | M      | 8%         | ND               | c.815A>G                   | p.(Asn27)            | 5                    | Dizziness, Tinnitus                                              | (-)                           | 20   | (+)          | (-)            |
| F24    | P38  | M      | 5%         | 97.8             | c.658C>T                   | p.(Arg220*)          | 7                    | Dizziness, Tinnitus, Vision loss                                 | HT, Hyper-HCY                 | 13   | (+)          | (-)            |
| F24    | P39  | F      | Nor.       | 9.37             |                            |                      | 18                   | Dizziness, Tinnitus, Cognitive decline                           | (-)                           | 7    | (-)          | (-)            |
| F25    | P40  | M      | 2%         | 16.25            | c.973G>A                   | p.(Gly32)            | 12                   | (-)                                                              | (-)                           | 19   | (+)          | (-)            |
| F26    | P41  | M      | 2%         | 80.17            | large intragenic deletions |                      | 7                    | (-)                                                              | (-)                           | 12   | (+)          | (-)            |

## Supplement table 1 (Continued)

| Family | No. | Gender | $\alpha$ -GalA (%) | Lyso-Gb3 (ng/ml) | GLA mutation           | Onset age (year-old) | CNS manifestations                                           | Risk factors                  | MSSI | Classic type | Clinical event |
|--------|-----|--------|--------------------|------------------|------------------------|----------------------|--------------------------------------------------------------|-------------------------------|------|--------------|----------------|
| F27    | P42 | F      | 47%                | 5.79             | c.167G>T p.(Cys56)     | 32                   | (-)                                                          | (-)                           | 6    | (-)          | (-)            |
| F28    | P43 | M      | 1%                 | 88.31            | c.1094dup p.(Tyr365*)  | 10                   | Stroke, Headache, Dizziness, Tinnitus, Vision loss,          | (-)                           | 20   | (+)          | (+)            |
| F29    | P44 | M      | 4%                 | ND               | c.132G>A p.            | 9                    | Stroke, Dizziness                                            | (-)                           | 12   | (+)          | (+)            |
| F30    | P45 | M      | 10%                | ND               | c.440G>A p.(Gly14)     | 9                    | Hearing loss                                                 | Hyper-HCY                     | 6    | (+)          | (-)            |
| F30    | P46 | F      | 12%                | 5.2              |                        | 12                   | Dizziness, Tinnitus, Hearing loss                            | AF                            | 9    | (-)          | (-)            |
| F31    | P47 | M      | 1%                 | 97.3             | c.511G>T p.(Gly17)     | 12                   | Tinnitus, Hearing                                            | Hyper-HCY                     | 15   | (+)          | (-)            |
| F32    | P48 | M      | 3%                 | 18.64            | c.511G>C p.(Gly171Cys) | 15                   | (-)                                                          | HT, Hyperlipidemia,           | 31   | (+)          | (+)            |
| F33    | P49 | M      | 3%                 | 88.41            | c.548-2A>G p.splicing  | 7                    | Stroke, Headache,                                            | Hyperlipidemia                | 22   | (+)          | (+)            |
| F34    | P50 | F      | 9%                 | 5.1              | c.334C>T p.(Arg112Cys) | 40                   | Headache, Dizziness, Tinnitus                                | (-)                           | 6    | (-)          | (-)            |
| F34    | P51 | M      | 1%                 | 43.3             |                        | 10                   | Tinnitus                                                     | Hyper-HCY                     | 28   | (+)          | (+)            |
| F35    | P52 | F      | 17%                | 1.27             | c.644A>G p.(Asn215Ser) | 70                   | Stroke, Headache, Dizziness,                                 | HT                            | 13   | (+)          | (+)            |
| F36    | P53 | M      | 2%                 | ND               | c.284G>A p.(Trp95*)    | 7                    | Headache, Dizziness, Tinnitus, Cognitive                     | HT, Hyperlipidemia, Hyper-    | 22   | (+)          | (-)            |
| F36    | P54 | F      | Nor.               | ND               |                        | 10                   | Headache, Dizziness, Tinnitus, Hearing                       | HT, DM                        | 10   | (-)          | (-)            |
| F37    | P55 | M      | 1%                 | 61.32            | c.782G>A p.(Gly26)     | 6                    | Vision loss                                                  | HT                            | 6    | (+)          | (-)            |
| F38    | P56 | M      | 2%                 | 79.19            | c.779G>C p.(Gly26)     | 6                    | (-)                                                          | (-)                           | 17   | (+)          | (-)            |
| F39    | P57 | F      | Nor.               | 5.2              | c.506T>C p.(Phe169Ser) | 35                   | (-)                                                          | HT, Hyperlipidemia            | ND   | (-)          | (-)            |
| F40    | P58 | F      | 21%                | 12.51            | c.266T>G p.(Leu89)     | 29                   | (-)                                                          | Hyperlipidemia                | 12   | (+)          | (-)            |
| F41    | P59 | M      | 2%                 | 20.74            | c.109G>A p.(Ala37Thr)  | 33                   | Tinnitus, Hearing loss, Vision loss                          | HT, Hyper-HCY                 | 31   | (+)          | (+)            |
| F42    | P60 | M      | 4%                 | 80.79            | c.146G>T p.(Arg49Leu)  | 8                    | Dizziness, Tinnitus, Hearing loss, Depression                | (-)                           | 22   | (+)          | (-)            |
| F43    | P61 | M      | 11%                | 9.58             | c.634C>T p.(Gln212*)   | 12                   | Stroke, Dizziness, Cognitive decline                         | HT, AF                        | 27   | (+)          | (+)            |
| F44    | P62 | F      | 11%                | 10.43            | c.680G>A p.(Arg22)     | 18                   | Depression                                                   | Hyperlipidemia                | 13   | (+)          | (-)            |
| F45    | P63 | M      | 2%                 | 71.38            | c.132G>T p.(Trp44)     | 6                    | Hearing loss                                                 | (-)                           | 19   | (+)          | (-)            |
| F46    | P64 | M      | 4%                 | 44.92            | c.511G>C p.(Gly171Arg) | 12                   | Stroke, Dizziness, Tinnitus, Hearing loss, Cognitive decline | HT, Hyperlipidemia, Hyper-HCY | 46   | (+)          | (+)            |
| F46    | P65 | F      | 6%                 | 1.43             |                        | 30                   | (-)                                                          | (-)                           | 1    | (-)          | (-)            |
| F47    | P66 | F      | 18%                | 1.17             | c.874G>C p.(Ala292)    | 50                   | Dizziness, Tinnitus                                          | DM                            | 3    | (-)          | (-)            |
| F48    | P67 | M      | 5%                 | 5.88             | c.640- p.splicing      | NS                   | (-)                                                          | (-)                           | 0    | (-)          | (-)            |
| F49    | P68 | F      | 26%                | 6.87             | c.613C>A p.(Pro205Thr) | 51                   | Dizziness, Cognitive decline                                 | Hyperlipidemia                | 4    | (-)          | (-)            |
| F50    | P69 | M      | 7%                 | 3.43             | c.640- p.splicing      | 37                   | Tinnitus,                                                    | (-)                           | 8    | (-)          | (-)            |
| F50    | P70 | F      | ND                 | 1.69             |                        | 4                    | Headache                                                     | (-)                           | 6    | (-)          | (-)            |
| F51    | P71 | M      | 3%                 | 129.25           | c.275A>T p.Asp92       | 12                   | Stroke, Dizziness                                            | Hyper-HCY                     | 35   | (+)          | (+)            |

\*: died at the age of 34; M:Male; F:Female; NS:No symptom; ND: Not done; Nor.:Normal; HT: Hypertension; DM:Diabetes;Hyper-HCY: Hyperhomocysteinemia; AF:Atrial fibrillation



**Supplement table 3 . The CVSD scores of Fabry disease**

| Family | No. | Gender | Examination age(year-old) | ARWML | Fazekas | EPVS | MARS | Lacuna | SVDS | GCA | Pulvinar Sign |
|--------|-----|--------|---------------------------|-------|---------|------|------|--------|------|-----|---------------|
| F1     | P1  | M      | 30                        | 16    | 3       | 1    | 2    | 1      | 3    | 11  | (-)           |
| F2     | P2  | F      | 54                        | 10    | 2       | 3    | 5    | 3      | 3    | 8   | (-)           |
| F2     | P3  | F      | 29                        | 19    | 3       | 4    | 0    | 6      | 2    | 16  | (-)           |
| F3     | P4  | M      | 25                        | 2     | 0       | 0    | ND   | 0      | ND   | 0   | (-)           |
| F3     | P5  | F      | 30                        | 2     | 1       | 0    | ND   | 0      | ND   | 0   | (-)           |
| F3     | P6  | M      | 28                        | 2     | 0       | 2    | ND   | 0      | ND   | 0   | (-)           |
| F3     | P7  | F      | 57                        | 18    | 3       | 2    | ND   | 3      | ND   | 15  | (-)           |
| F4     | P8  | M      | 43                        | 4     | 1       | 2    | ND   | 0      | ND   | 6   | (-)           |
| F5     | P9  | M      | 24                        | 0     | 0       | 2    | ND   | 0      | ND   | 2   | (-)           |
| F6     | P10 | M      | 32                        | 16    | 3       | 2    | ND   | 2      | ND   | 17  | (+)           |
| F7     | P11 | F      | 21                        | 2     | 1       | 1    | ND   | 0      | ND   | 0   | (-)           |
| F8     | P12 | M      | 31                        | 6     | 2       | 0    | 1    | 0      | 2    | 6   | (-)           |
| F9     | P13 | M      | 20                        | 2     | 1       | 0    | ND   | 0      | ND   | 0   | (-)           |
| F10    | P14 | M      | 38                        | 5     | 1       | 1    | 0    | 0      | 1    | 5   | (-)           |
| F11    | P15 | M      | 27                        | 4     | 1       | 2    | 4    | 2      | 3    | 0   | (-)           |
| F12    | P16 | M      | 26                        | 14    | 3       | 3    | ND   | 3      | ND   | 11  | (+)           |
| F13    | P17 | M      | 21                        | 8     | 2       | 3    | 0    | 0      | 2    | 14  | (-)           |
| F14    | P18 | M      | 36                        | 6     | 2       | 2    | 0    | 1      | 1    | 5   | (-)           |
| F14    | P19 | F      | 39                        | 6     | 2       | 0    | ND   | 1      | ND   | 6   | (-)           |
| F15    | P20 | M      | 50                        | 14    | 3       | 2    | 4    | 3      | 3    | 7   | (+)           |
| F15    | P21 | M      | 47                        | 4     | 1       | 1    | 0    | 0      | 1    | 13  | (-)           |
| F15    | P22 | F      | 29                        | 2     | 1       | 1    | ND   | 0      | ND   | 0   | (-)           |
| F16    | P23 | M      | 43                        | 2     | 1       | 1    | 0    | 0      | 0    | 0   | (-)           |
| F16    | P24 | F      | 18                        | 2     | 1       | 0    | 0    | 0      | 0    | 0   | (-)           |
| F17    | P25 | M      | 51                        | 14    | 3       | 2    | 0    | 2      | 3    | 13  | (-)           |
| F17    | P26 | F      | 23                        | 0     | 0       | 0    | 0    | 0      | 0    | 0   | (-)           |
| F18    | P27 | M      | 24                        | 4     | 1       | 0    | 0    | 0      | 1    | 2   | (-)           |
| F18    | P28 | F      | 45                        | 8     | 2       | 0    | 0    | 0      | 1    | 4   | (-)           |
| F18    | P29 | M      | 39                        | 8     | 2       | 2    | 2    | 4      | 3    | 11  | (-)           |
| F19    | P30 | F      | 62                        | 14    | 3       | 1    | ND   | 0      | ND   | 13  | (-)           |
| F19    | P31 | M      | 34                        | 4     | 1       | 2    | 0    | 0      | 1    | 4   | (-)           |
| F20    | P32 | M      | 7                         | 0     | 0       | 1    | 0    | 0      | 0    | 0   | (-)           |
| F20    | P33 | M      | 26                        | 0     | 0       | 1    | 0    | 0      | 0    | 0   | (-)           |
| F21    | P34 | F      | 65                        | 16    | 3       | 2    | ND   | 2      | ND   | 12  | (-)           |
| F21    | P35 | M      | 37                        | 2     | 1       | 3    | 2    | 1      | 3    | 8   | (-)           |
| F22    | P36 | M      | 26                        | 2     | 1       | 1    | ND   | 0      | ND   | 0   | (-)           |
| F23    | P37 | M      | 15                        | 2     | 1       | 1    | 0    | 0      | 1    | 0   | (-)           |
| F24    | P38 | M      | 16                        | 2     | 1       | 1    | 0    | 0      | 1    | 2   | (-)           |
| F24    | P39 | F      | 43                        | 14    | 3       | 2    | ND   | 0      | ND   | 6   | (-)           |
| F25    | P40 | M      | 22                        | 10    | 2       | 2    | 2    | 0      | 2    | 17  | (-)           |
| F26    | P41 | M      | 17                        | 2     | 1       | 1    | ND   | 0      | ND   | 0   | (-)           |
| F27    | P42 | F      | 34                        | 8     | 2       | 2    | 0    | 0      | 1    | 6   | (-)           |
| F28    | P43 | M      | 42                        | 17    | 3       | 3    | 4    | 4      | 4    | 18  | (-)           |
| F29    | P44 | M      | 43                        | 12    | 2       | 2    | 0    | 3      | 3    | 13  | (-)           |
| F30    | P45 | M      | 16                        | 0     | 0       | 0    | 0    | 0      | 0    | 0   | (-)           |
| F30    | P46 | F      | 57                        | 0     | 0       | 0    | ND   | 0      | ND   | 0   | (-)           |
| F31    | P47 | M      | 17                        | 2     | 1       | 0    | 2    | 0      | 2    | 0   | (-)           |
| F32    | P48 | M      | 32                        | 5     | 1       | 1    | 0    | 0      | 1    | 0   | (-)           |
| F33    | P49 | M      | 38                        | 10    | 2       | 1    | 2    | 1      | 3    | 13  | (-)           |
| F34    | P50 | F      | 49                        | 0     | 0       | 0    | ND   | 0      | ND   | 0   | (-)           |
| F34    | P51 | M      | 22                        | 5     | 1       | 0    | 0    | 0      | 1    | 0   | (-)           |
| F35    | P52 | F      | 77                        | 10    | 2       | 0    | 0    | 0      | 1    | 8   | (-)           |
| F36    | P53 | M      | 26                        | 0     | 0       | 1    | ND   | 0      | ND   | 2   | (-)           |
| F36    | P54 | F      | 53                        | 10    | 2       | 2    | ND   | 0      | ND   | 10  | (-)           |
| F37    | P55 | M      | 19                        | 1     | 1       | 1    | ND   | 0      | ND   | 0   | (-)           |
| F38    | P56 | M      | 30                        | 0     | 0       | 1    | 0    | 0      | 0    | 9   | (-)           |
| F39    | P57 | F      | 41                        | 2     | 1       | 1    | ND   | 0      | ND   | 0   | (-)           |
| F40    | P58 | F      | 49                        | 9     | 2       | 1    | ND   | 0      | ND   | 8   | (-)           |
| F41    | P59 | M      | 43                        | 8     | 2       | 1    | 0    | 2      | 3    | 4   | (+)           |
| F42    | P60 | M      | 30                        | 8     | 2       | 2    | ND   | 0      | ND   | 5   | (-)           |
| F43    | P61 | M      | 53                        | 9     | 2       | 1    | ND   | 1      | ND   | 4   | (-)           |
| F44    | P62 | F      | 30                        | 2     | 1       | 1    | 0    | 0      | 1    | 0   | (-)           |
| F45    | P63 | M      | 27                        | 2     | 1       | 0    | ND   | 1      | ND   | 0   | (-)           |
| F46    | P64 | M      | 69                        | 12    | 2       | 2    | 3    | 4      | 4    | 14  | (-)           |
| F46    | P65 | F      | 33                        | 0     | 0       | 0    | 0    | 0      | 0    | 0   | (-)           |
| F47    | P66 | F      | 57                        | 1     | 1       | 2    | ND   | 1      | ND   | 6   | (-)           |
| F48    | P67 | M      | 34                        | 0     | 0       | 0    | 0    | 0      | 0    | 0   | (-)           |
| F49    | P68 | F      | 58                        | 7     | 2       | 0    | ND   | 0      | ND   | 10  | (-)           |
| F50    | P69 | M      | 38                        | 2     | 1       | 2    | 1    | 0      | 1    | 0   | (+)           |
| F50    | P70 | F      | 7                         | 6     | 2       | 0    | 0    | 0      | 1    | 0   | (-)           |
| F51    | P71 | M      | 45                        | 14    | 3       | 2    | ND   | 0      | ND   | 17  | (-)           |

### Supplement table 4. Imaging analysis between truncated mutation and non-truncated mutation group

|                     | Truncated mutation | Non-truncated mutation | P-value |
|---------------------|--------------------|------------------------|---------|
| No.                 | 30                 | 41                     |         |
| Gender(M%)          | 70%                | 61%                    | 0.463   |
| Onset-age(year-old) | 9(7, 11.5)         | 10(7, 28)              | 0.128   |
| α-GalA              | 0.7(0.34, 3.35)    | 0.8(0.35, 2.77)        | 0.952   |
| Lyso-Gb3            | 80.66(9.42, 95.65) | 19.69(5.13, 77.24)     | 0.053   |
| Smoke               | 16.7%              | 19.5%                  | >0.999  |
| HT                  | 26.7%              | 29.3%                  | >0.999  |
| DM                  | 3.3%               | 2.4%                   | >0.999  |
| Hyperlipidemia      | 20.0%              | 26.8%                  | 0.582   |
| Hyper-HCY           | 16.7%              | 22.0%                  | 0.764   |
| AF                  | 6.7%               | 2.4%                   | 0.57    |
| Headache            | 20.0%              | 17.1%                  | 0.766   |
| Dizziness           | 63.3%              | 46.3%                  | 0.228   |
| Tinnitus            | 46.7%              | 29.3%                  | 0.145   |
| Hearing loss        | 26.7%              | 24.4%                  | 0.335   |
| Vision loss         | 20.0%              | 7.3%                   | 0.154   |
| Cognitive decline   | 30.0%              | 17.1%                  | 0.254   |
| Depression          | 20.0%              | 14.6%                  | 0.75    |
| Pulvinar Sign       | 6.7%               | 7.3%                   | >0.999  |
| ARWML               | 5.5(2, 10.5)       | 2(1.5, 8.5)            | 0.133   |
| Fazekas             | 1.5(1, 2)          | 1(0.5, 2)              | 0.236   |
| EPVS                | 2(1,2)             | 1(0, 2)                | 0.013*  |
| MARS                | 0(0, 2)            | 0(0, 0.75)             | 0.234   |
| Lacuna              | 0(0, 2)            | 0(0, 1)                | 0.289   |
| SVDS                | 2(1,3)             | 1(0, 2)                | 0.059   |
| GCA                 | 4.5(0, 12.25)      | 0(0, 8.5)              | 0.149   |

### Supplement table 5. Brain MRI follow-up in Fabry disease

| No. | Gender | Lyso-Gb3 | α-GalA | MSSI | Follow-up years | ▲ARWML | ▲Fazekas | ▲EPVS | ▲MARS | Lacuna | ▲SVDS | ▲GCA |
|-----|--------|----------|--------|------|-----------------|--------|----------|-------|-------|--------|-------|------|
| P1  | 1      | 97.3     | 0.32   | 45   | 2.58            | 1.55   | 0.39     | 0.39  | ND    | 0.39   | ND    | 0.00 |
| P12 | 1      | 87.2     | 0.35   | 48   | 7.50            | 1.33   | 0.27     | 0.27  | ND    | 0.53   | ND    | 2.09 |
| P15 | 1      | 89.18    | 0.3    | 20   | 5.67            | 0.71   | 0.18     | 0.00  | 0.18  | 0.00   | 0.53  | 0.35 |
| P17 | 1      | 81.23    | 0.24   | 19   | 11.08           | 0.18   | 0.00     | 0.00  | 0.18  | 0.00   | 0.09  | 0.09 |
| P18 | 1      | 51.71    | 0.9    | 34   | 8.83            | 0.45   | 0.11     | 0.11  | ND    | 0.57   | ND    | 0.86 |
| P20 | 1      | ND       | 0.8    | 42   | 5.75            | 1.04   | 0.00     | 0.35  | ND    | 0.00   | ND    | 2.37 |
| P25 | 1      | 89.75    | 0.22   | 59   | 7.58            | 1.45   | 0.13     | 0.26  | ND    | 0.53   | ND    | 6.17 |
| P31 | 1      | 200      | 0.6    | 33   | 3.00            | 0.33   | 0.00     | 1.00  | 0.33  | 0.00   | 0.00  | 1.88 |
| P43 | 1      | 88.31    | 0.1    | 20   | 2.08            | 4.32   | 0.48     | 0.48  | 0.00  | 0.00   | 0.00  | 0.87 |
| P45 | 1      | ND       | 1.8    | 6    | 2.42            | 0.00   | 0.41     | 0.41  | ND    | 0.00   | ND    | 0.00 |
| P47 | 1      | 97.3     | 0.2    | 15   | 1.83            | 3.27   | 0.55     | 0.00  | 0.00  | 0.00   | 0.00  | 1.09 |
| P48 | 1      | 18.64    | 0.52   | 31   | 1.92            | 2.09   | 1.04     | 0.00  | ND    | 0.00   | ND    | 0.67 |
| P49 | 1      | 88.41    | 0.5    | 22   | 2.33            | 0.00   | 0.00     | 0.00  | 0.43  | 0.43   | 0.00  | 0.96 |
| P55 | 1      | 61.32    | 0.2    | 6    | 2.33            | 0.43   | 0.00     | 0.00  | ND    | 0.00   | ND    | 0.00 |
| P60 | 1      | 80.79    | 0.73   | 22   | 0.83            | 2.40   | 0.00     | 0.00  | ND    | 1.20   | ND    | 3.60 |
| P8  | 1      | 103.84   | 0.1    | 23   | 2.00            | 0.50   | 0.50     | 0.00  | ND    | 0.00   | ND    | 2.00 |
| P2  | 0      | 20.26    | 8.7    | 48   | 2.92            | 2.74   | 0.34     | 0.00  | 1.71  | 1.71   | 0.00  | 0.54 |
| P26 | 0      | 3.1      | 3.63   | 2    | 4.00            | 0.00   | 0.00     | 0.00  | 0.00  | 0.00   | 0.05  | 0.89 |
| P3  | 0      | 10.84    | 16     | 24   | 2.67            | 0.38   | 0.00     | 0.00  | ND    | 0.75   | ND    | 3.75 |
| P42 | 0      | 5.79     | 8.3    | 6    | 4.25            | 0.47   | 0.47     | 0.00  | ND    | 0.94   | ND    | 0.91 |
| P5  | 0      | 3.08     | 2.54   | 11   | 8.58            | 0.00   | 0.00     | 0.12  | 0.00  | 0.00   | 0.00  | 0.00 |
| P7  | 0      | 3.31     | 2.37   | 18   | 5.58            | 0.00   | 0.00     | 0.00  | ND    | 0.00   | ND    | 0.00 |
| P70 | 0      | ND       | ND     | 6    | 1.92            | 1.57   | 0.52     | 0.00  | 0.00  | 0.00   | 0.00  | 0.00 |
